# Supplementary material
Source: JCI journal article supplement (doi:10.1172/jci130850)
Supplement: sd1 [file 1]

## **Supplementary Materials**

Figure S1. Principal coordinate analysis of flow cytometric dataset

Figure S2. PMN and CD8<sup>+</sup> T cell content in L-ADCA TCGA dataset

Figure S3. M-IHC panel development

Figure S4. M-IHC image analysis workflow

Table S1. Histological subtypes of resection cohort

Table S2. M-IHC immune cell markers

Table S3. M-IHC antibody staining sequences

Table S4. NSCLC treatment cohort demographics

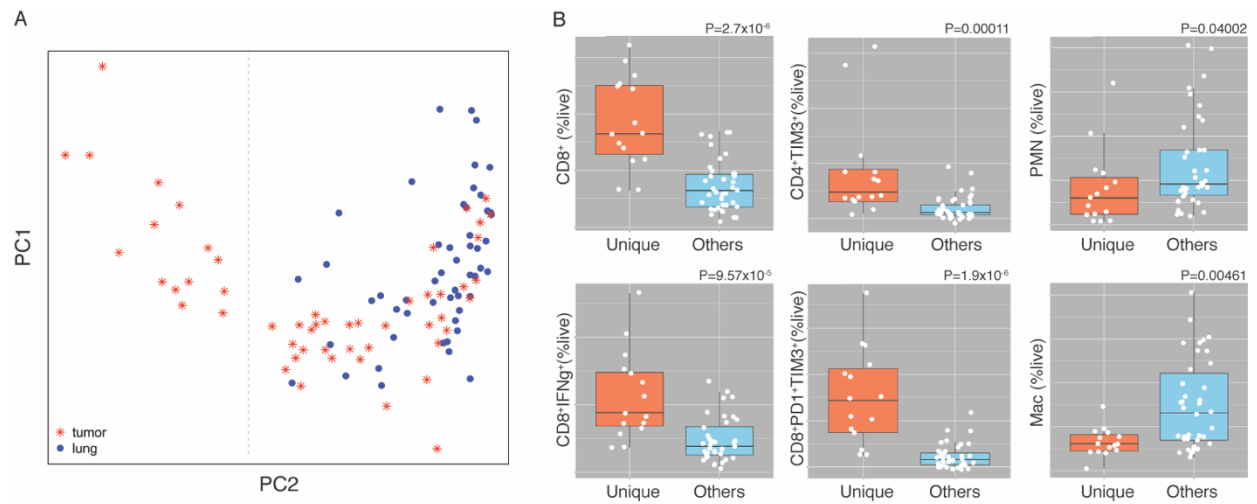

**Figure S1. Principle Coordinate Analysis Identified Unique Immune Cell Phenotype.** A) Principal Coordinate Analysis (PCoA) of flow cytometric data for lung tumor tissue and non-adjacent lung tissue from N=73 NSCLC resection specimens. The lung tissue and lung cancer profiles segregate together with the exception of N=15 lung cancer cases that clearly separate from the remainder of the group (left). These cases were labeled Immune Unique. B) Key immune cell populations that best distinguish between Immune Unique cases and the remainder of the cohort. P values as indicated (as determined by Student's t-test).

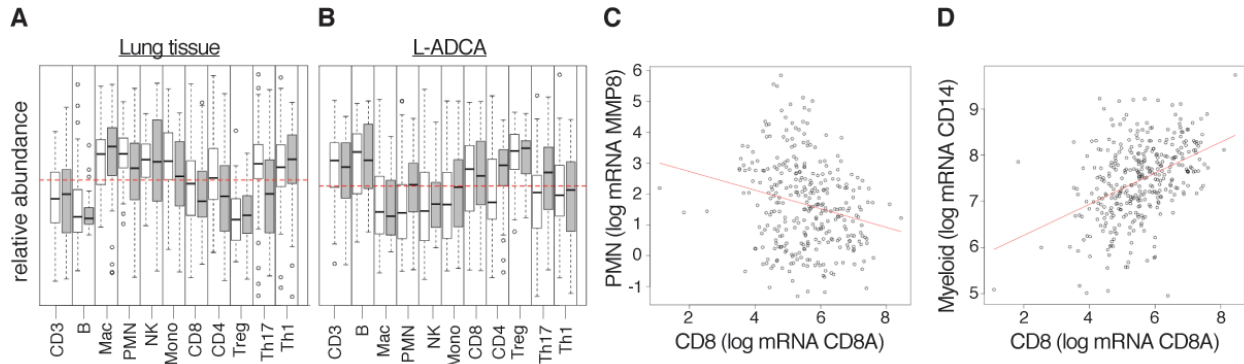

**Figure S2. PMN and CD8<sup>+</sup> T Cell Content in L-ADCA TCGA Dataset.** Logarithmic comparison of immune cell composition determined by flow cytometry (white bars) and TCGA data (grey bars) in A) lung tissue and B) L-ADCA tissue. Correlation of log transcript abundance between C) neutrophils (MMP8) and CD8<sup>+</sup> cells (CD8A) ( $P=6.18 \times 10^{-5}$ ) and between monocytes (CD14) and CD8<sup>+</sup> cells ( $P=2.0 \times 10^{-16}$ ) using data extracted from the lung adenocarcinoma dataset.

**A**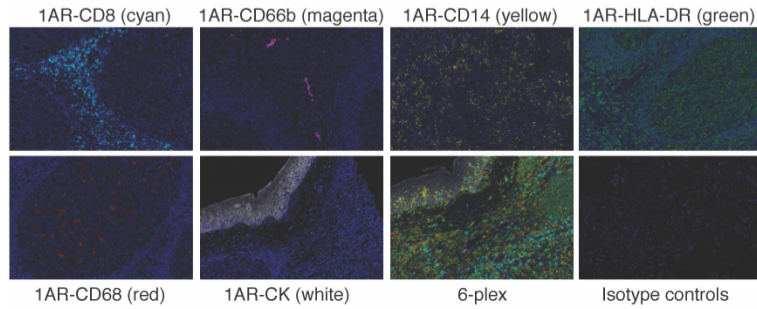**B**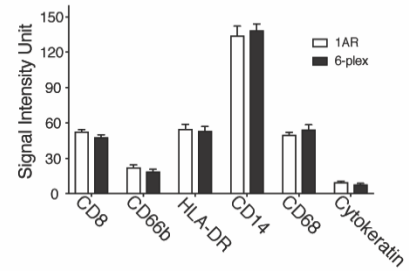

**Figure S3. M-IHC Panel Development.** Each antibody was tested for staining signal intensity on both single stains (1-antigen retrieval, 1AR) and on a 6-plex slide with multiple cycles of antigen retrieval and staining. A) Representative images of individual marker stained slides, 6-plex staining, and isotype controls on normal tonsil tissue. Isotype controls had gone through six staining cycles. DAPI was used as a nuclear counterstain (blue). B) Comparison of marker signal strength at baseline (1AR) vs. 6-plex. None of these comparisons reached statistical significance (Student's t-test).

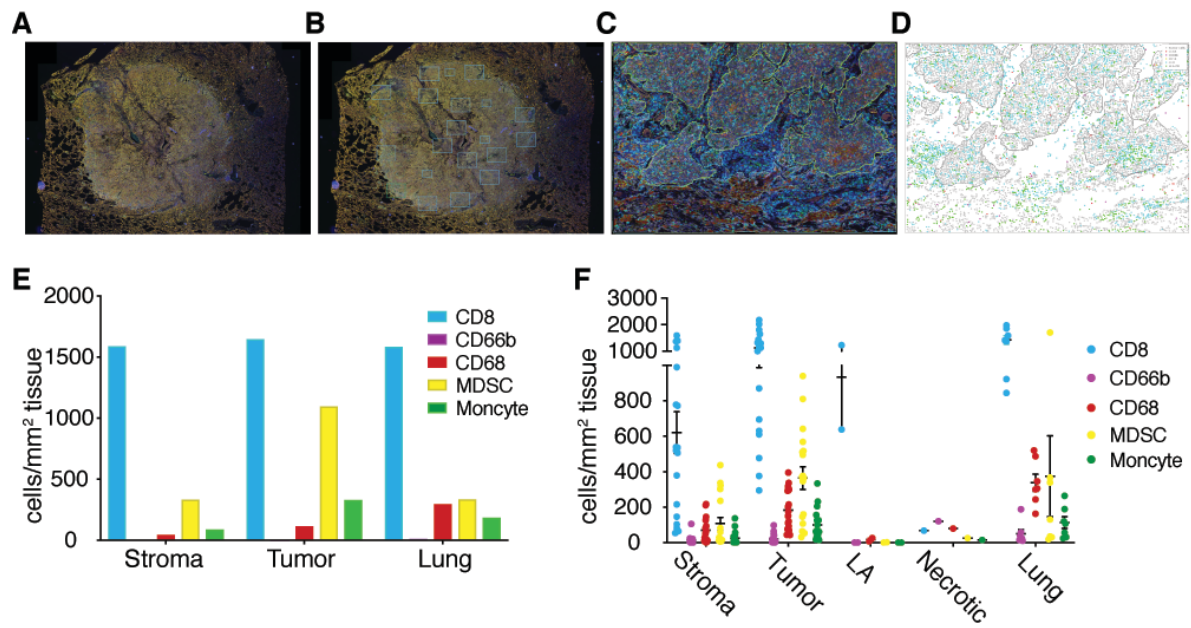

**Figure S4. M-IHC Image Analysis Workflow.** A) Representative image of whole slide scan (10X) of a multiplex-stained slide. B) Representative example of 15-20 regions of interest (ROI) stamps (20X) placed over the tumor lesion from (A) covering areas across adjacent lung-tumor interface, stroma, tumor, necrotic tumor, and lymphoid aggregate (LA). C) Tumor tissue from a single ROI annotated by tissue compartment. D) Spatial distribution plot of the ROI depicted in (C) showing positive cells gated by threshold. E) Tabulated immune cell content for the individual ROI in (C). F) Tabulated immune cell content for all of the ROIs encompassing the slide in (A). Bars +/- SEM.

**Table S1.** Histological Subtypes of Resection Cohort

| <b>Phenotype</b>     | <b>N</b> | <b>LUAD (%)</b> | <b>LUSQ (%)</b> | <b>Other (%)</b> |
|----------------------|----------|-----------------|-----------------|------------------|
| <b>Inert</b>         | 10       | 10 (100%)       | 0 (0%)          | 0 (0%)           |
| <b>Myeloid</b>       | 24       | 14 (58%)        | 8 (33%)         | 2 (8%)           |
| <b>Active</b>        | 20       | 15 (75%)        | 4 (20%)         | 1 (5%)           |
| <b>Indeterminant</b> | 10       | 10 (71%)        | 3 (21%)         | 1 (7%)           |

\*Groups are not statistically different with respect to LUAD and LUSC distribution (Chi-square test).

**Table S2. M-IHC immune cell markers**

| <b>HUMAN</b>                                 |              |              |                |                  |              |
|----------------------------------------------|--------------|--------------|----------------|------------------|--------------|
| <b>Antigen</b>                               | <b>Color</b> | <b>Clone</b> | <b>Company</b> | <b>Catalog #</b> | <b>Panel</b> |
| <b>Cytokeratin (panCK)</b>                   | White        | AE1/AE3      | Dako           | M3515            | 1,2          |
| <b>CD4</b>                                   | Yellow       | EP204        | Epitomics      | AC0173A          | 2            |
| <b>CD8</b>                                   | Cyan         | C8/144B      | Dako           | M7103            | 1,2          |
| <b>CD14</b>                                  | Yellow       | EPR3653      | Cell Marque    | 114R-14          | 1            |
| <b>CD66b</b>                                 | Magenta      | G10F5        | BD Pharmingen  | 555723           | 1,2          |
| <b>CD68</b>                                  | Red          | PG-M1        | Dako           | M0876            | 1            |
| <b>HLA-DR</b>                                | Green        | TAL.1B5      | Dako           | M0746            | 1            |
| <b>MOUSE</b>                                 |              |              |                |                  |              |
| <b>Antigen</b>                               | <b>Color</b> | <b>Clone</b> | <b>Company</b> | <b>Catalog #</b> | <b>Panel</b> |
| <b>Cytokeratin (wide spectrum screening)</b> | Red          | WSS          | Dako           | Z0622            | N/A          |
| <b>CD8</b>                                   | Yellow       | 4SM15        | eBiosciences   | 14-0808-80       | N/A          |
| <b>Ly6G</b>                                  | Green        | 1A8          | BioLegend      | 127601           | N/A          |

**Table S3. M-IHC antibody staining sequences**

| <b>Panel 1: 6-plex (Resection Cohort)</b>  |                 |                    |                       |                       |                   |
|--------------------------------------------|-----------------|--------------------|-----------------------|-----------------------|-------------------|
| <b>Position</b>                            | <b>Antibody</b> | <b>Clone/ Host</b> | <b>Company / Item</b> | <b>Concentration</b>  | <b>OPAL Fluor</b> |
| 1                                          | CD8             | 144B/Mouse         | Dako/M7103            | 1:800 (0.2ug/mL)      | Opal 540          |
| 2                                          | CD66b           | G10F5/Mouse        | BD Pharm/555723       | 1:250 (2ug/mL)        | Opal 520          |
| 3                                          | HLA-DR          | TAL.1B5/Mouse      | Dako/M0746            | 1:800 (0.03ug/mL)     | Opal 570          |
| 4                                          | CD14            | EPR3653/Rabbit     | Cell Marque/114R-14   | 1:150 (0.125ug/mL)    | Opal 620          |
| 5                                          | CD68            | PG-M1/Mouse        | Dako/M0876            | 1:800 (0.04ug/mL)     | Opal 650          |
| 6                                          | CK-ae1/3        | AE1/AE3/Mouse      | Dako/M3515            | 1:500 (0.33ug/mL)     | Opal 690          |
| <b>Panel #2: 4-plex (Treatment Cohort)</b> |                 |                    |                       |                       |                   |
| <b>Position</b>                            | <b>Antibody</b> | <b>Clone/ Host</b> | <b>Company / Item</b> | <b>Concentration</b>  | <b>OPAL Fluor</b> |
| 1                                          | CD8             | 144B/Mouse         | Dako/M7103            | 1:800 (0.2ug/mL)      | Opal 540          |
| 2                                          | CD66b           | G10F5/Mouse        | BD Pharm/555723       | 1:250 (2ug/mL)        | Opal 570          |
| 3                                          | CD4             | EP204/Rabbit       | Epitomics/AC0173A     | 1:100 (0.165ug/mL)    | Opal 520          |
| 4                                          | CK-ae1/3        | AE1/AE3/Mouse      | Dako/M3515            | 1:500 (0.33ug/mL)     | Opal 690          |
| <b>Panel #3: 3-plex (Mouse)</b>            |                 |                    |                       |                       |                   |
| <b>Position</b>                            | <b>Antibody</b> | <b>Clone/ Host</b> | <b>Company / Item</b> | <b>Concentration</b>  | <b>OPAL Fluor</b> |
| 1                                          | Ly6G            | 1A8/Rat            | Biologend/127601      | 1:4000 (0.125ug/mL)   | Opal 520          |
| 2                                          | CD8a            | 4SM15/Rat          | eBiosciences/14-0808  | 1:1500 (0.33ug/mL)    | Opal 570          |
| 3                                          | CK-wss          | WSS/Rabbit         | Dako                  | 1:20,000 (0.535ug/mL) | Opal 690          |

**Table S4. NSCLC treatment cohort demographics**

| <b>Factor</b>        | <b>All</b> | <b>CR/PR</b> | <b>SD</b> | <b>PD</b> |
|----------------------|------------|--------------|-----------|-----------|
| <i>N</i>             | 28         | 8 (28%)      | 10 (36%)  | 10 (39%)  |
| <b>Age</b>           | 65.1       | 69.1         | 62.8      | 64.2      |
| <b>% Male</b>        | 57         | 75           | 45.5      | 50        |
| <b>Race</b>          |            |              |           |           |
| <b>White</b>         | 26 (93)    | 8 (100)      | 8 (80)    | 10 (100)  |
| <b>Asian</b>         | 2 (7)      | 0            | 2 (20)    | 0         |
| <b>Other</b>         | 0          | 0            | 0         | 0         |
| <b>Smoking</b>       |            |              |           |           |
| <b>Current</b>       | 5 (18)     | 3 (37.5)     | 1 (10)    | 1(10)     |
| <b>Former</b>        | 15 (53.5)  | 2 (25)       | 7 (70)    | 6 (60)    |
| <b>Never</b>         | 8 (28.5)   | 3 (37.5)     | 2 (20)    | 3 (30)    |
| <b>Pack Years</b>    | 30.6       | 39.6         | 21.3      | 34.9      |
| <b>Drug</b>          |            |              |           |           |
| <b>pembrolizumab</b> | 11 (39.2)  | 4 (37.5)     | 5 (50)    | 2 (20)    |
| <b>nivolumab</b>     | 9 (32.2)   | 2 (25)       | 3 (30)    | 4 (40)    |
| <b>atezolizumab</b>  | 6 (21.4)   | 2 (25)       | 1 (10)    | 3 (30)    |
| <b>avelumab</b>      | 1 (3.6)    | 0            | 0         | 1 (10)    |
| <b>durvalumab</b>    | 1 (3.6)    | 0            | 1 (10)    | 0         |
